# Supplementary material for: Prenatal Concentrations of Polychlorinated Biphenyls, DDE, and DDT and Overweight in Children: A Prospective Birth Cohort Study
Source: PubMed Central journal article supplement (PMC3295349; doi:10.1289/ehp.1103862), 2011-10-25
Supplement: ehp.1103862.s001.pdf [file ehp.1103862.s001.pdf]

## SUPPLEMENTAL MATERIAL

### **Prenatal Concentrations of PCBs, DDE, DDT and Overweight in Children: A Prospective Birth Cohort Study**

Damaskini Valvi<sup>1,2,3,4,\*</sup>, Michelle A. Mendez<sup>1,2,3</sup>, David Martinez<sup>1,2,3</sup>, Joan O. Grimalt<sup>5</sup>, Maties Torrent<sup>6</sup>, Jordi Sunyer<sup>1,2,3,4</sup>, Martine Vrijheid<sup>1,2,3</sup>

<sup>1</sup>Centre for Research in Environmental Epidemiology (CREAL), Barcelona, Spain

<sup>2</sup>Hospital del Mar Research Institute (IMIM), Barcelona, Spain

<sup>3</sup>CIBER Epidemiología y Salud Pública (CIBERESP), Barcelona, Spain

<sup>4</sup>Pompeu Fabra University, Barcelona, Spain

<sup>5</sup>Department of Environmental Chemistry, Institute of Environmental Assessment and Water Research (IDAEA-CSIC), Barcelona, Spain

<sup>6</sup>Àrea de Salut de Menorca, IB-SALUT, Menorca, Spain

\*Corresponding author contact information: [dvalvi@creal.cat](mailto:dvalvi@creal.cat)

### **Table Of Contents**

---

Suppl. Material, Table 1. Characteristics in the subsample of excluded subjects and in the analysis sample.....*page 2*

Suppl. Material, Table 2. Multivariable-adjusted estimated effects in the subgroup of children with postnatal OC concentrations.....*page 3*

---

**Supplemental Material, Table 1. Comparison of characteristics in the subsample of excluded subjects (N=138) and in the analysis sample (N=344)**

| Characteristics                             | Excluded Subjects<br>(N=138) |                   | Included Subjects<br>(N=344) |                   | p-value <sup>b</sup> |
|---------------------------------------------|------------------------------|-------------------|------------------------------|-------------------|----------------------|
|                                             | Value <sup>a</sup>           | Missings<br>N (%) | Value <sup>a</sup>           | Missings<br>N (%) |                      |
| <b>Child characteristics</b>                |                              |                   |                              |                   |                      |
| Sex – Female                                | 56 (40.6)                    | 0 (0%)            | 178 (51.7)                   | 0 (0%)            | 0.03                 |
| Age – years                                 | 6.7 ± 0.2                    | 0 (0%)            | 6.7 ± 0.2                    | 0 (0%)            | 0.81                 |
| Gestational age – weeks                     | 38.6 ± 2.6 <sup>c</sup>      | 0 (0%)            | 39.6 ± 1.2                   | 0 (0%)            | < 0.01               |
| Birth weight – grams                        | 3052 ± 611 <sup>c</sup>      | 0 (0%)            | 3240 ± 438                   | 0 (0%)            | < 0.01               |
| Breastfeeding – weeks                       |                              |                   |                              |                   |                      |
| <2                                          | 34 (24.6)                    |                   | 64 (18.6)                    |                   |                      |
| 2-25                                        | 72 (52.2)                    |                   | 170 (49.4)                   |                   |                      |
| >25                                         | 32 (23.2)                    | 0 (0%)            | 110 (32.0)                   | 0 (0%)            | 0.11                 |
| <b>Maternal characteristics</b>             |                              |                   |                              |                   |                      |
| Age at pregnancy - years                    |                              |                   |                              |                   |                      |
| <30                                         | 67 (56.5)                    |                   | 181 (52.6)                   |                   |                      |
| 30-35                                       | 42 (30.4)                    |                   | 119 (34.6)                   |                   |                      |
| >35 years                                   | 18 (13.0)                    | 0 (0%)            | 44 (12.8)                    | 0 (0%)            | 0.67                 |
| Parity - nulliparous                        | 71 (51.4)                    | 0 (0%)            | 166 (48.3)                   | 0 (0%)            | 0.53                 |
| BMI before pregnancy > 25 kg/m <sup>2</sup> | 28 (20.3)                    | 7 (5%)            | 68 (20.0)                    | 5 (1%)            | 0.82                 |
| Smoking any time in pregnancy – yes         | 58 (42.0)                    | 0 (0%)            | 124 (36.1)                   | 0 (0%)            | 0.22                 |
| Alcohol consumption in pregnancy - yes      | 14 (10.1)                    | 0 (0%)            | 30 (8.7)                     | 0 (0%)            | 0.63                 |
| Diabetes – yes                              | 5 (3.6)                      | 0 (0%)            | 20 (5.8)                     | 0 (0%)            | 0.33                 |
| Education - more than secondary             | 55 (40.7)                    | 3 (2%)            | 139 (41.9)                   | 13 (4%)           | 0.80                 |
| Social class                                |                              |                   |                              |                   |                      |
| Non-manuals                                 | 53 (38.4)                    |                   | 156 (45.3)                   |                   |                      |
| Manuals                                     | 48 (34.8)                    |                   | 117 (34.0)                   |                   |                      |
| Unclassified                                | 37 (26.8)                    | 0 (0%)            | 71 (20.6)                    | 0 (0%)            | 0.25                 |
| <b>Paternal characteristics</b>             |                              |                   |                              |                   |                      |
| Education - more than secondary             | 38 (28.4)                    | 4 (3%)            | 118 (35.0)                   | 7 (2%)            | 0.17                 |
| Social class                                |                              |                   |                              |                   |                      |
| Non-manuals                                 | 49 (35.5)                    |                   | 118 (34.3)                   |                   |                      |
| Manuals                                     | 83 (60.1)                    |                   | 219 (63.7)                   |                   |                      |
| Unclassified                                | 6 (4.3)                      | 0 (0%)            | 7 (2.1)                      | 0 (0%)            | 0.34                 |

<sup>a</sup> Values are means ± SD for continuous and N (%) for categorical variables.

<sup>b</sup> Chi-square for categorical variables; t-test (for normally distributed) or Wilcoxon-Mann-Whitney (for non-normal distribution) for continuous variables.

<sup>c</sup> Excluded subjects include preterm births. Excluded subjects after omitting preterm births (N=122); birthweight mean ± SD = 3189 ± 490, p-value=0.23 and gestational age mean ± SD=39.5 ± 1.32, p-value=0.71.

**Supplemental Material, Table 2. Adjusted estimated effects (RR, 95% CI) of prenatal PCB, DDE and DDT concentrations on overweight at 6.5 years in the subgroup of children with postnatal OC exposures measured in child's serum at age 4 years (N=216)<sup>a</sup>.**

| <b>Prenatal OC concentrations (ng/mL)</b> | <b>N</b> | <b>Multivariable-adjusted model 1<sup>b</sup></b> | <b>Multivariable-adjusted model 1+ postnatal OC exposure<sup>b,c,d</sup></b> |
|-------------------------------------------|----------|---------------------------------------------------|------------------------------------------------------------------------------|
| <b>PCBs</b>                               |          |                                                   |                                                                              |
| < 0.6                                     | 57       | Ref.                                              | Ref.                                                                         |
| 0.6-0.9                                   | 76       | 1.17 (0.60, 2.27)                                 | 1.17 (0.61, 2.27)                                                            |
| > 0.9                                     | 83       | 2.00 (1.12, 3.57)                                 | 2.16 (1.22, 3.84)                                                            |
| <b>DDE</b>                                |          |                                                   |                                                                              |
| < 0.7                                     | 65       | Ref.                                              | Ref.                                                                         |
| 0.7-1.5                                   | 79       | 1.70 (0.93, 3.10)                                 | 1.71 (0.93, 3.12)                                                            |
| > 1.5                                     | 72       | 1.60 (0.89, 2.92)                                 | 1.64 (0.88, 3.06)                                                            |
| <b>DDT</b>                                |          |                                                   |                                                                              |
| < 0.06                                    | 84       | Ref.                                              | Ref.                                                                         |
| 0.06-0.18                                 | 73       | 0.98 (0.55, 1.74)                                 | 0.99 (0.55, 1.77)                                                            |
| > 0.18                                    | 59       | 1.06 (0.61, 1.86)                                 | 1.06 (0.59, 1.90)                                                            |

<sup>a</sup>Non-selective subgroup of the analysis population for child characteristics such as sex, age, birthweight, breastfeeding, BMI z-scores, or maternal characteristics such as age, parity, pre-pregnancy BMI, smoking in pregnancy, education and social class.

<sup>b</sup>Adjusted for birthweight, previous parity, maternal pre-pregnancy BMI, maternal education and social class at pregnancy, maternal smoking in pregnancy, maternal age at delivery and breastfeeding.

<sup>c</sup>Additionally adjusted for postnatal exposure of the OC tested (all OCs in tertiles).

<sup>d</sup>Spearman correlations between pre- and post-natal exposures; Rho (p-value)= 0.28 (<0.01) for PCBs, 0.46 (<0.01) for DDE and 0.18 (<0.01) for DDT.
